# Supplementary material
Source: publisher figshare collection journal article supplement (https://diabetesjournals.figshare.com/ndownloader/files/22748306)
Supplement: Supplementary file 1 [file 22748306]

**Supplementary Table 1: Primer sequences**

| Gene | Forward primer sequence | Reverse primer sequence |
| --- | --- | --- |
| *Cyclophilin-b* | CCG GGA CAA GCC ACT GAA | GGC GAA GGG TTT CTC CAC TT |
| *Scd1* | CCC TGC GGA TCT TCC TTA T | GCC CAT TCG TAC ACG TCA T |
| *Srebp1c* | GCC ATG GAT TGC ACA TTT GA | GGC CCG GGA AGT CAC TG |
| *Il-1* | CTA CAG GCT CCG AGA TGA ACA AC | TCC ATT GAG GTG GAG AGC TTT C |
| *Mcp1* | GCC TGC TGT TCA CAG TTG C | CAG GTG AGT GGG GCG TTA |
| *Il-6* | CCA TCC AGT TGC CTT CTT G | TCT CCT CTC CGG ACT TGT G |
| *Tnf* | GGC ACT CCC CCA AAA GAT G | AGG AAT GAG AAG AGG CTG AGA CA |
| *Nf-b* | CCA GCT TCC GTG TTT GTT CA | AGG GTT TCG GTT CAC TAG TTT CC |
| *Cd11c* | GAG CCA GAA CTT CCC AAC TG | TCA GGA ACA CGA TGT CTT GG |
| *F4/80* | GGA GGA CTT CTC CAA GCC TAT T | AGG CCT CTC AGA CTT CTG CTT |
| *Ucp1* | CCC TGG CAA AAA CAG AAG GA | AGC TGA TTT GCC TCT GAA TGC |
| *Ucp3* | TGC TGA GAT GGT GAC CTA CGA | CCA AAG GCA GAG ACA AAG TGA |
| *Prdm16* | ACA GGC AGG CTA AGA ACC AG | CGT GGA GAG GAG TGT CTT CAG |
| *Cidec* | CGC ATC GTG AAG GAG ATC GT | AGG TGC CAA GCA GCA TGT G |
| *Mmp9* | ACG ACA TAG ACG GCA TCC A | GCT GTG GTT CAG TTG TGG TG |
| *Leptin* | CCA CAC ACA GCT GGA AAC TC | GCT TCA GAT CCA TCA AAA TAG A |
| *Adiponectin* | GGG CTC AGG ATG CTA CTG TT | AAC GTC ATC TTC GGC ATG A |
| *Ptprf* | GCC CGT ACA GCA CAG TCC | CGG TGG AAC CCA ACT TAC C |
| *Timp3* | CTT GGG CTT GTC GTG CTC | CTT CTT TCC CAC CAC TTT GG |
| *Dusp4* | ctg tac ctc cca gca cca at | GAG GAA AGG GAG GAT TTC CA |
| *Etv6* | cct gcg cca cta cta caa act | CTG GGG TTT TCA TGA ACC TG |
| *Sox9* | gta ccc gca tct gca caa c | CTC CTC CAC GAA GGG TCT CT |
| *Nfia* | cca gaa ctt ggt gga tgg at | GAA CCA TGT GTA GGC GAA GG |
| *Sptlc1* | AGG GTT CTA TGG CAC ATT TGA TG | TGG CTT CTT CGG TCT TCA TAA AC |
| *Sptlc2* | CAA AGA GCT TCG GTG CTT CAG | GAA TGT GTG CGC AGG TAG TCT ATC |
| *CerS1* | CTG TTC TAC TTG GCC TGT TG | TCA TGC AGG AAG AAC ACG AG |
| *CerS2* | TCT TCT CAA AAA GTT CCG AG | AGT GAT GAT GAA AAC GAA TGG |
| *CerS3* | TGG CTG CTA TTA GTC TGA TG | TCA GGA TAA AGT AAC CCC AG |
| *CerS4* | TGT CGT TCA GCT TGA GTG AG | AGC AGG CTT CAC AGA ATT TC |
| *CerS5* | CTC CAA CGC TCA CGA AAT TTC | ATG CAG ACA GAA GAT GAG TG |
| *CerS6* | GTT CGG AGC ATT CAA CGC TG | CTG AGT CGT GAA GAC AGA GG |
